# Supplementary material for: The F19W mutation reduces the binding affinity of the transmembrane Aβ11–40 trimer to the membrane bilayer
Source: Royal Society of Chemistry journal article supplement (doi:10.1039/d0ra08837d), 2021-01-01
Supplement: d0ra08837d1.pdf [file d0ra08837d1.pdf]

## Supplementary Information

### **The F19W mutation reduces the binding affinity of the transmembrane A $\beta$ <sub>11-40</sub> trimer to the membrane bilayer**

**Thanh Thuy Tran,<sup>ab\*</sup> Feng Pan,<sup>c</sup> Linh Tran,<sup>de</sup> Christopher Roland<sup>f</sup> and Celeste Sagui<sup>f</sup>**

<sup>a</sup>Laboratory of Theoretical and Computational Biophysics, Ton Duc Thang University, Ho Chi Minh City, Vietnam;

<sup>b</sup>Faculty of Applied Sciences, Ton Duc Thang University, Ho Chi Minh City, Vietnam.

<sup>c</sup>Department of Statistics, Florida State University, Tallahassee, Florida, USA

<sup>d</sup>Institute of Fundamental and Applied Sciences, Duy Tan University, Ho Chi Minh City, 700000, Vietnam

<sup>e</sup>Faculty of Natural Sciences, Duy Tan University, Da Nang City, 550000, Vietnam

<sup>f</sup>Department of Physics, North Carolina State University, Raleigh, North Carolina, USA

Email: [tranthanhthuy@tdtu.edu.vn](mailto:tranthanhthuy@tdtu.edu.vn)

Table S1: A summary of the mutation studies.

| System/Sequence          | Ref. | Type of Study                                               | Mutation  | Main Results                                                                                                                                                                                                                                                                                                                                                                                                                                                                                                                 |
|--------------------------|------|-------------------------------------------------------------|-----------|------------------------------------------------------------------------------------------------------------------------------------------------------------------------------------------------------------------------------------------------------------------------------------------------------------------------------------------------------------------------------------------------------------------------------------------------------------------------------------------------------------------------------|
| Trimer A $\beta_{11-40}$ | 28   | REMD in water solution<br>(AMBER force-field + TIP3P water) | Wild-type | $\beta$ -content: $42 \pm 6\%$ , coil: $49 \pm 7\%$ ,<br>Intermolecular interactions in the central hydrophobic cores stabilize the oligomer; Intermolecular polar contacts between D23 and residues 24-29 stabilize loop regions, Nter is maintain by intermolecular polar crossing contacts H13A-Q15B and H13B-Q15C.                                                                                                                                                                                                       |
| Trimer A $\beta_{11-40}$ | 29   | REMD in water solution<br>(AMBER force-field + TIP3P water) | E22Q      | The $\beta$ -structure decreases in N-terminal but increases in C-terminal. The representative shapes of the E22Q trimer adopt a significant increase in $\beta$ -structure ( $\beta$ : 47%). Enhancing the intramolecular polar contacts between the residue D23 to residues (24-29). The mutant is more stable than the WT.                                                                                                                                                                                                |
| Trimer A $\beta_{11-40}$ | 30   | REMD in water<br>(AMBER force-field + TIP3P water)          | D23N      | The D23N mutant has higher $\beta$ -structure and stronger inter-chain interactions; There are structural changes, and the mutant has an enhanced aggregation rate. The A $\beta$ fibril-binding ligands bind to the D23N and WT forms at different poses.                                                                                                                                                                                                                                                                   |
| Trimer A $\beta_{11-40}$ | 31   | REMD in water,<br>(Amber99SB-ILDN, TIP3P water)             | F19W      | Secondary structure: 3% less $\beta$ (39%) and 3% more coil content (52%) than WT; there is a decrease in most of the polar contacts, except for D23-K28 salt bridge (12%). Six minima were identified in the free energy surface, which account for 20% of the total conformations. The binding free energy between neighbour chains of the mutant trimer increases by $\sim 28$ kcal mol $^{-1}$ but fluctuates significantly ( $\pm 27.1$ kcal mol $^{-1}$ ). The solvated F19W is more flexible than the WT in solution. |
| Trimer A $\beta_{11-40}$ | 32   | REMD in DPPC lipid bilayer<br>and in solution               | E22K      | The mutant size was larger than the WT; the $\beta$ -content increases. Increasing contacts between peptide-membrane. The mutant is more stable than the WT.                                                                                                                                                                                                                                                                                                                                                                 |
| Trimer A $\beta_{11-40}$ | 33   | REMD in water +<br>DPPC lipid bilayer                       | A21G      | Conformational changes and wider free energy minima on the free energy surface and altered surface charges, weaker affinity to the DPPC lipid bilayers. These results are consistent with experimental data shown that A21G mutants of A $\beta$ peptides have a lower aggregation rate.                                                                                                                                                                                                                                     |
| Trimer A $\beta_{11-40}$ | 34   | REMD in water +<br>DPPC lipid bilayer                       | Wild-type | $\beta$ : $\sim 40\%$ , coil: 57%, salt-bridge D23-N27 stabilizes the loop region of the peptide.<br>The trimer strongly attracts the DPPC lipid bilayer.                                                                                                                                                                                                                                                                                                                                                                    |

To be continued ...

| System/Sequence                                 | Ref.            | Type of study                                                                                                     | Mutation                                           | Main results                                                                                                                                                                                                                                                                                                                                                                                                                                                                                                                                                                                                                                                                                             |
|-------------------------------------------------|-----------------|-------------------------------------------------------------------------------------------------------------------|----------------------------------------------------|----------------------------------------------------------------------------------------------------------------------------------------------------------------------------------------------------------------------------------------------------------------------------------------------------------------------------------------------------------------------------------------------------------------------------------------------------------------------------------------------------------------------------------------------------------------------------------------------------------------------------------------------------------------------------------------------------------|
| $A\beta_{1-40}$                                 | 36              | Experiment (Fluorescences)                                                                                        | F19W, F20W                                         | F19W, F20W do not hinder fibril formation. Monomer F19W fluorescence displays remarkable blue-shift over monomer F20W. F20W has a less hydrophobic environment than F19W in $A\beta$ fibrils.                                                                                                                                                                                                                                                                                                                                                                                                                                                                                                            |
| Monomer $A\beta_{1-40}$                         | 37              | MD simulation in water                                                                                            | Double L17A/F19A                                   | The $\beta$ -sheet content decrease, the salt bridge D23-K28 decrease, the helical conformation is the dominant conformation in $A\beta_{40}$ (L17A/F19A) L17A/F19A double mutation diminishes $A\beta_{40}$ aggregation.                                                                                                                                                                                                                                                                                                                                                                                                                                                                                |
| Gene of the APP (A $\beta$ -precursor protein)  | 38              | Clinical experiments in the cerebral haemorrhage patients IV-3                                                    | A21G (Flemish)                                     | Presenile dementia and cerebral haemorrhage linked to Flemish A21G mutant of the APP gene                                                                                                                                                                                                                                                                                                                                                                                                                                                                                                                                                                                                                |
| Gene of the APP                                 | 39              | Clinical experiments in the cerebral haemorrhage patients                                                         | Dutch D22Q                                         | APP Gene and Hereditary Cerebral Hemorrhage with Amyloidosis (Dutch)                                                                                                                                                                                                                                                                                                                                                                                                                                                                                                                                                                                                                                     |
| Gene of the Fatal familial insomnia (FFI)       | 40              | Clinical experiments and genomic studies                                                                          | Italian E22K                                       | Fatal familial insomnia: Genetic, neuropathologic, and biochemical study of a patient from a new Italian kindred                                                                                                                                                                                                                                                                                                                                                                                                                                                                                                                                                                                         |
| $A\beta_{1-40}$ and $A\beta_{1-42}$             | 41              | Discrete molecular dynamics (DMD) studies in implicit solvent                                                     | E22G                                               | The average $\beta$ -strand content in both alloforms increases with temperature. At physiological temperatures, both $A\beta_{40}$ and $A\beta_{42}$ adopt a collapsed-coil conformation with several short $\beta$ -strands and a small (<1%) amount of $\alpha$ -helical structure. At slightly above physiological temperature, folded $A\beta_{42}$ monomers display larger amounts of $\beta$ -strands than the $A\beta_{40}$ monomers. E22G disrupts contacts in the A21-A30 region of both mutant $A\beta$ peptides, resulting in a less stable main folding region relative to the WT peptides. Arctic mutant induces significant structural change at N-terminus of the $A\beta_{40}$ peptide. |
| Monomer $A\beta_{1-40}$                         | 42              | MD simulation in water                                                                                            | E22G<br>L17A/F19A/E22G                             | Increasing the helical content in the CHC and C-terminal region of [A17/A19/G22] $A\beta_{40}$ as compared to [G22] $A\beta_{40}$ [A17/A19/G22] $A\beta_{40}$ reduces the fibril formation rate by 0.57 times of [G22] $A\beta_{40}$ [A17/A19/G22] $A\beta_{40}$ diminishes aggregation compared to [G22] $A\beta_{40}$                                                                                                                                                                                                                                                                                                                                                                                  |
| Gene of the APP                                 | 43              | Clinical experiments in the AD patients                                                                           | E22 $\Delta$                                       | There is mutant enhanced oligomerization but no fibrillization, as well as inhibited hippocampal long-term potentiation over the WT peptide in rats <i>in vivo</i> .                                                                                                                                                                                                                                                                                                                                                                                                                                                                                                                                     |
| Gene of the APP                                 | 44              | Clinical experiments in AD patients                                                                               | D23N                                               | Widespread neurofibrillary tangles, and unusually extensive distribution of $A\beta_{40}$ in plaques. Increasing toxicity.                                                                                                                                                                                                                                                                                                                                                                                                                                                                                                                                                                               |
| Monomer $A\beta_{42}$                           | 45              | REMD simulations                                                                                                  | A2V                                                | The $\beta$ -sheet structure of A2V $A\beta_{42}$ monomer is more than that in the wild-type monomer. A2V $A\beta_{42}$ is more toxic than WT $A\beta_{42}$ .                                                                                                                                                                                                                                                                                                                                                                                                                                                                                                                                            |
| $A\beta_{1-40}$                                 | 46              | Experiments (fluorescence, transmission electron microscopy, X-ray diffraction, and solid-state NMR spectroscopy) | F19G, F19P, F19E, F19K, F19Y, F19W, L34E, and L34K | Local interactions impact the fibrillation kinetics, the structures (the intermolecular hydrogen bonds) and dynamics of the $A\beta_{40}$ , but leave the general fibril structure unchanged.                                                                                                                                                                                                                                                                                                                                                                                                                                                                                                            |
| $A\beta_{1-40}$                                 | 47              | Computational + experimental studies                                                                              | F19K                                               | The perturbation contacts K19-L34 influence the local structure of fibrils but eliminates cytotoxicity                                                                                                                                                                                                                                                                                                                                                                                                                                                                                                                                                                                                   |
| Dimer $A\beta_{3-40}$ and dimer $A\beta_{9-42}$ | 48              | MD in water (GROMOS96 ff + spc water)                                                                             | A21G                                               | The impact of the mutation A21G on $A\beta$ structure and dynamics varies from $A\beta_{40}$ to $A\beta_{42}$ . A21G destabilizes the $\beta$ -sheets and in $A\beta_{40}$ , but not in $A\beta_{42}$ . Structural changes resulting in a reduced aggregation rate of $A\beta$ fibrils containing the Flemish disease-causing mutation.                                                                                                                                                                                                                                                                                                                                                                  |
| Present studies (F19W trimer $A\beta_{11-40}$ ) | this manuscript | REMD in water + DPPC lipid bilayer                                                                                | F19W                                               | The coil contents decrease $\sim$ 15.3% (average value 41.7%); the $\beta$ -contents increases $\sim$ 4.46% (mean value 44.46%); essential salt-bridges (D23-N27 and D23-K28) disappear; total membrane-peptide contacts increases; structural diversity is greater with higher free energy values, the mutant is more flexible than the WT. Twelve minima were found in the free energy surface, with representative states in the form of two 3-stranded- $\beta$ -sheets with either antiparallel or perpendicular patterns, which may act as nucleation for fibrillation. The binding free energy of protein-DPPC lipid bilayer increases by 46.74 kcal/mol.                                         |

## Free Energy Perturbation (FEP) Method

In this method, the free energy difference between a system in its bound and unbound state is calculated as a function of a coupling parameter  $\lambda$  using MD simulations. Essentially, the bound state system is characterized with a Hamiltonian with  $\lambda$  set to zero, while the fully unbounded system is characterized by a Hamiltonian with  $\lambda$  equal to unity. Systems with intermediate values of  $\lambda$  are then defined such that the free energy change between neighbouring intermediate states with  $\lambda_i$  and  $\lambda_{i+1}$  is then  $\Delta G_{\lambda_i \Rightarrow \lambda_{i+1}}$  which is calculated by means of Bennet's Acceptance Ratio (BAR)[1]. The full free energy difference between the unbound and the bound state is then obtained from a summation over all of these intermediate values:

$$\Delta G = \sum_{\lambda=0}^{\lambda=1} \Delta G_{\lambda_i \Rightarrow \lambda_{i+1}}$$

By varying  $\lambda$  from 0 to 1, the peptide is *de facto* annihilated from the transmembrane and solvated systems through an alteration of the non-bonded interactions, as illustrated in Figure S1. As a result, the peptide was annihilated twice in the two different systems; we therefore refer to the method as the double-annihilation binding free energy method.

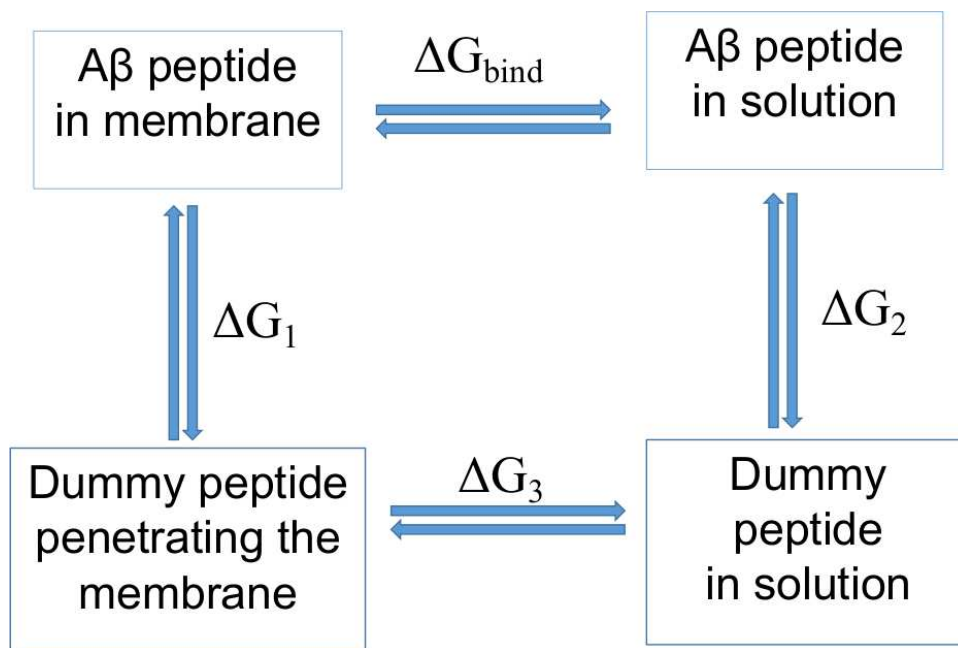

Figure S1: A schematic of the double-annihilation binding free energy method. In this scheme,  $A\beta$  peptide in the membrane represents the full-interaction state of the  $A\beta$  peptide with the solvated membrane system.  $A\beta$  peptide in solution represents the full-interaction state of the protein in solution, while the dummy protein indicates the protein without any interaction with surrounding molecules.

Our calculations here follow the previous work of Ngo et al.,[3]. A total of 15 values of  $\lambda$  were set up to reduce the non-bonded interactions from the full-interaction condition to the non-interaction mode with each simulation lasting 5 ns. The MD simulations were performed with the same starting conformations and initial velocities; but with different values of  $\lambda$ . The Coulomb interaction was reduced by six values of the coupling parameter  $\lambda$ , consisting of 0.00, 0.35, 0.55, 0.73, 0.88, and 1.00. The van der Waals interactions were set using 10 different  $\lambda$  values as follows: 0.00, 0.10, 0.20, 0.25, 0.30, 0.40, 0.55, 0.70, 0.85, and 1.00. Overall, the binding free energy of the truncated mutant trimer and the membrane lipid bilayers was given by:

$$\Delta G_{bind} = \Delta G_1 - \Delta G_2$$

## Free Energy Surface (FES)

The FES of the mutant trimer was constructed using the “gmx sham” tools[4] of GROMACS with the root-mean-square deviation (RMSD) and the radius of gyration (Rg) serving as the reaction coordinates. The “gmx sham” creates a multi-dimensional free-energy by reading and analyzing data sets. It plots the Gibbs free energy landscapes by a Boltzmann inversion of the multi-dimensional histograms. In our study, a 2-dimensional FES was calculated using two reaction coordinates RMSD and Rg, with ranges 0.37 – 0.66 nm for RMSD, and 1.39 – 1.56 nm for Rg, respectively. The FES was calculated on a  $40 \times 40$  grid.

## Collision Cross Section (CCS)

The collision cross section (CCS) values of the F19W  $3A\beta_{11-40}$  were calculated using The Ion Mobility Projection Approximation Calculation Tool (IMPACT)[2]. IMPACT can theoretically

calculate collision cross section of protein models through the projection approximation method. IMPACT can also estimate CCS values of proteins from their coordinate trajectory files produced from MD simulations, leading per-frame CCS measurements to be calculated in a high-throughput manner. Our calculations used IMPACT with the trajectory method.

## References

- [1] BENNETT, C. H. Efficient estimation of free energy differences from monte carlo data. *J. Comput. Phys.* 22 (1976), 245–268.
- [2] MARKLUND, E. G., DEGIACOMI, M. T., ROBINSON, C. V., BALDWIN, A. J., AND BENESCH, J. L. Collision cross sections for structural proteomics. *Structure* 23, 4 (2015), 791–799.
- [3] NGO, S. T., HUNG, H. M., TRAN, K. N., AND NGUYEN, M. T. Replica exchange molecular dynamics study of the amyloid beta (11-40) trimer penetrating a membrane. *RSC. Adv.* 7, 12 (2017), 7346–7357.
- [4] PAPALEO, E., MEREGHETTI, P., FANTUCCI, P., GRANDORI, R., AND DE GIOIA, L. Free-energy landscape, principal component analysis, and structural clustering to identify representative conformations from molecular dynamics simulations: the myoglobin case. *J. Mol. Graph Model* 27, 8 (2009), 89–99.

The transmembrane mutant F19W A $\beta_{11-40}$  trimer was investigated using the temperature replica exchange molecular dynamics simulations with explicit solvent with 32 different replicas from 321 to 423 K. These temperatures are: 321.0, 323.9, 326.9, 329.9, 332.9, 335.9, 338.9, 342.0, 345.1, 348.2, 351.3, 354.5, 357.6, 360.8, 364.0, 367.3, 370.6, 373.9, 377.2, 380.5, 383.9, 387.3, 390.7, 394.1, 397.6, 401.1, 404.6, 408.1, 411.7, 415.3, 418.9, and 422.6 K.

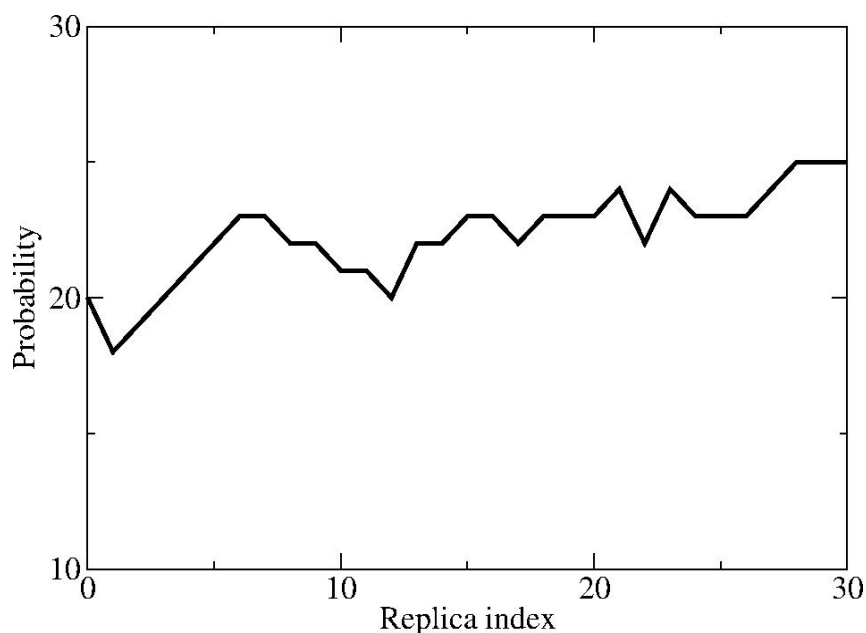

Figure S2: The mean exchange rates between neighboring replicas during 400 ns of REMD simulations.

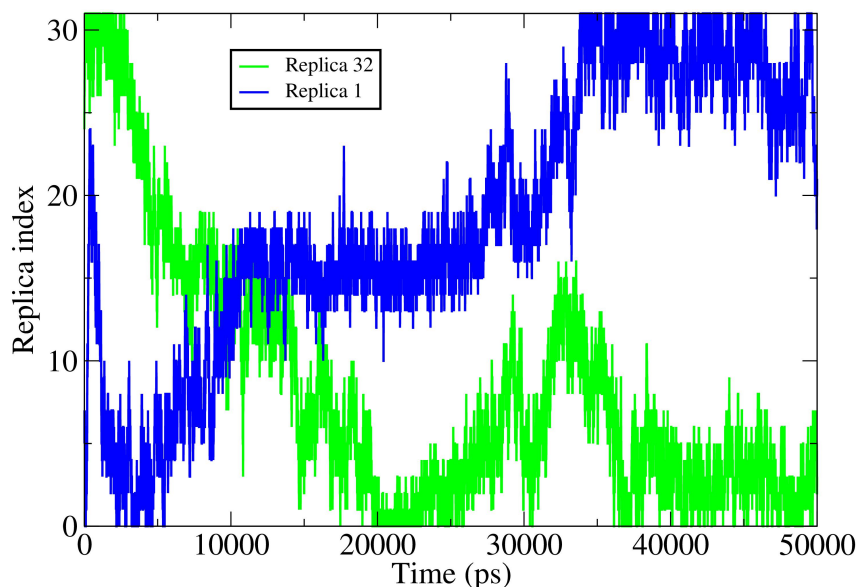

Figure S3. The temperature indices of replicas 1<sup>st</sup> and 32<sup>th</sup> are dispersed in the entire temperature space.

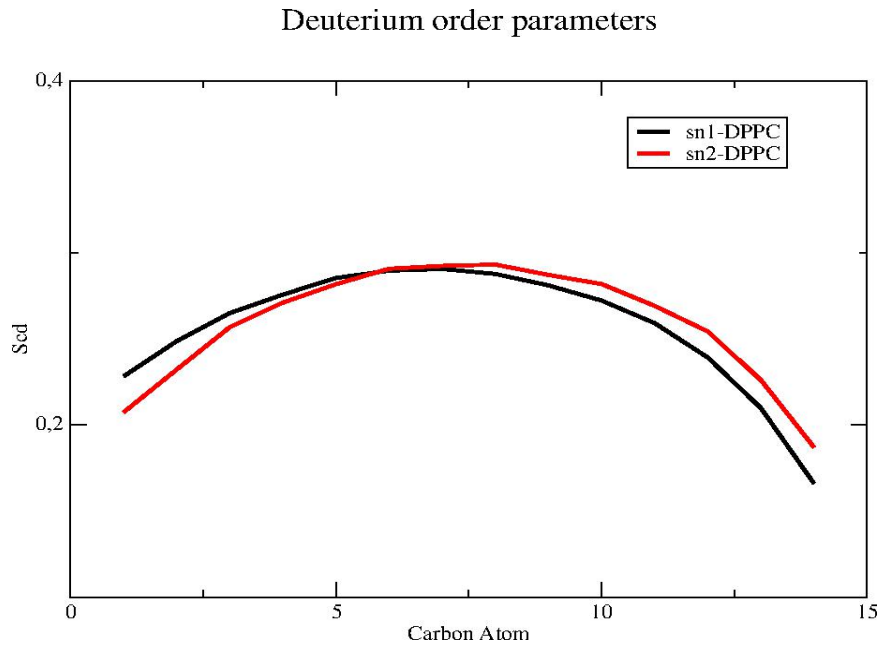

Figure S4. The lipid order parameters are investigated the both carbons atoms of acyl chains sn-1 (black) and sn-2 (red). The results are averaged over last 150 ns of the temperature REMD simulations.

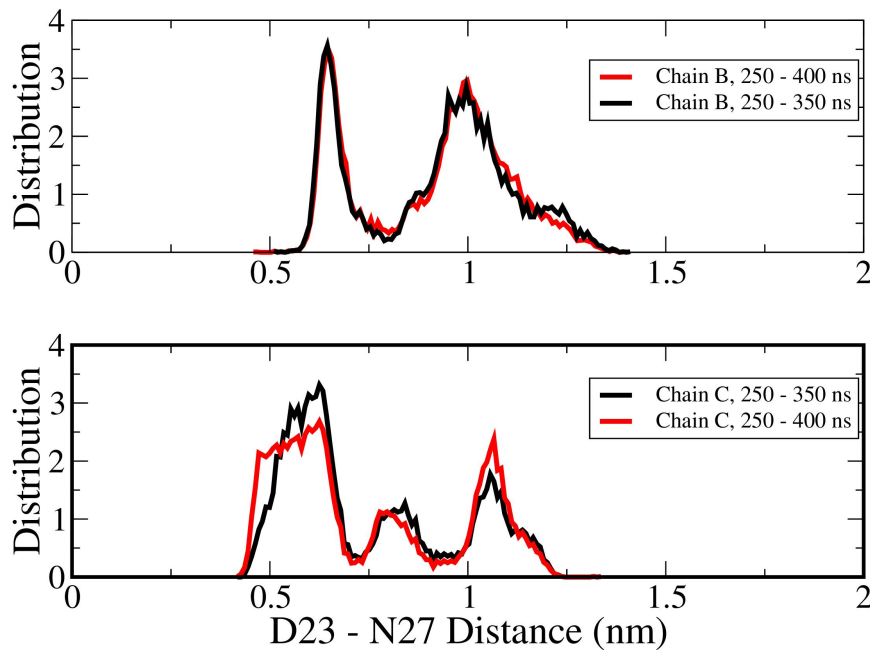

Figure S5. Convergence of REMD simulations at 324 K. Distance distributions between the charge groups of D23 and N27 of chain B and chain C of the transmembrane mutant F19W  $3A\beta_{11-40}$ . The results were calculated for two time intervals 250-350 ns (black curves) and 250-400 ns (red curves).

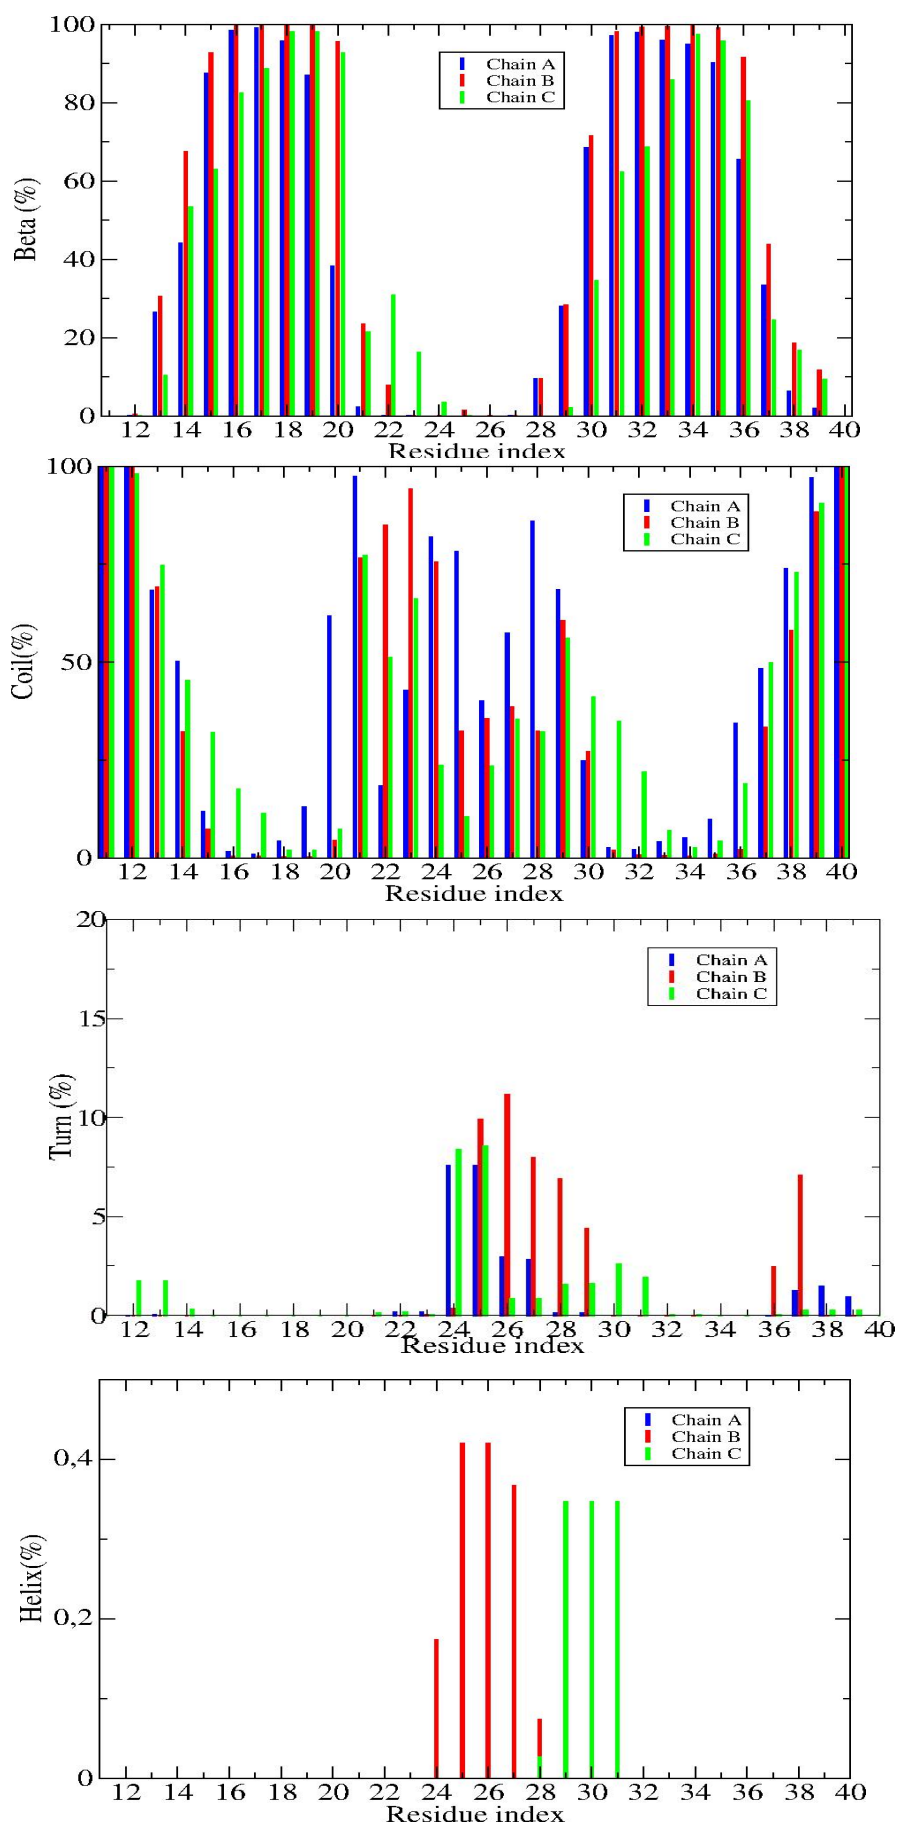

Figure S6. The secondary structure distribution per residue of transmembrane F19W 3A $\beta$ <sub>11-40</sub> peptide, which were averaged from the last 150 ns of REMD simulations at 324K using DSSP tools.



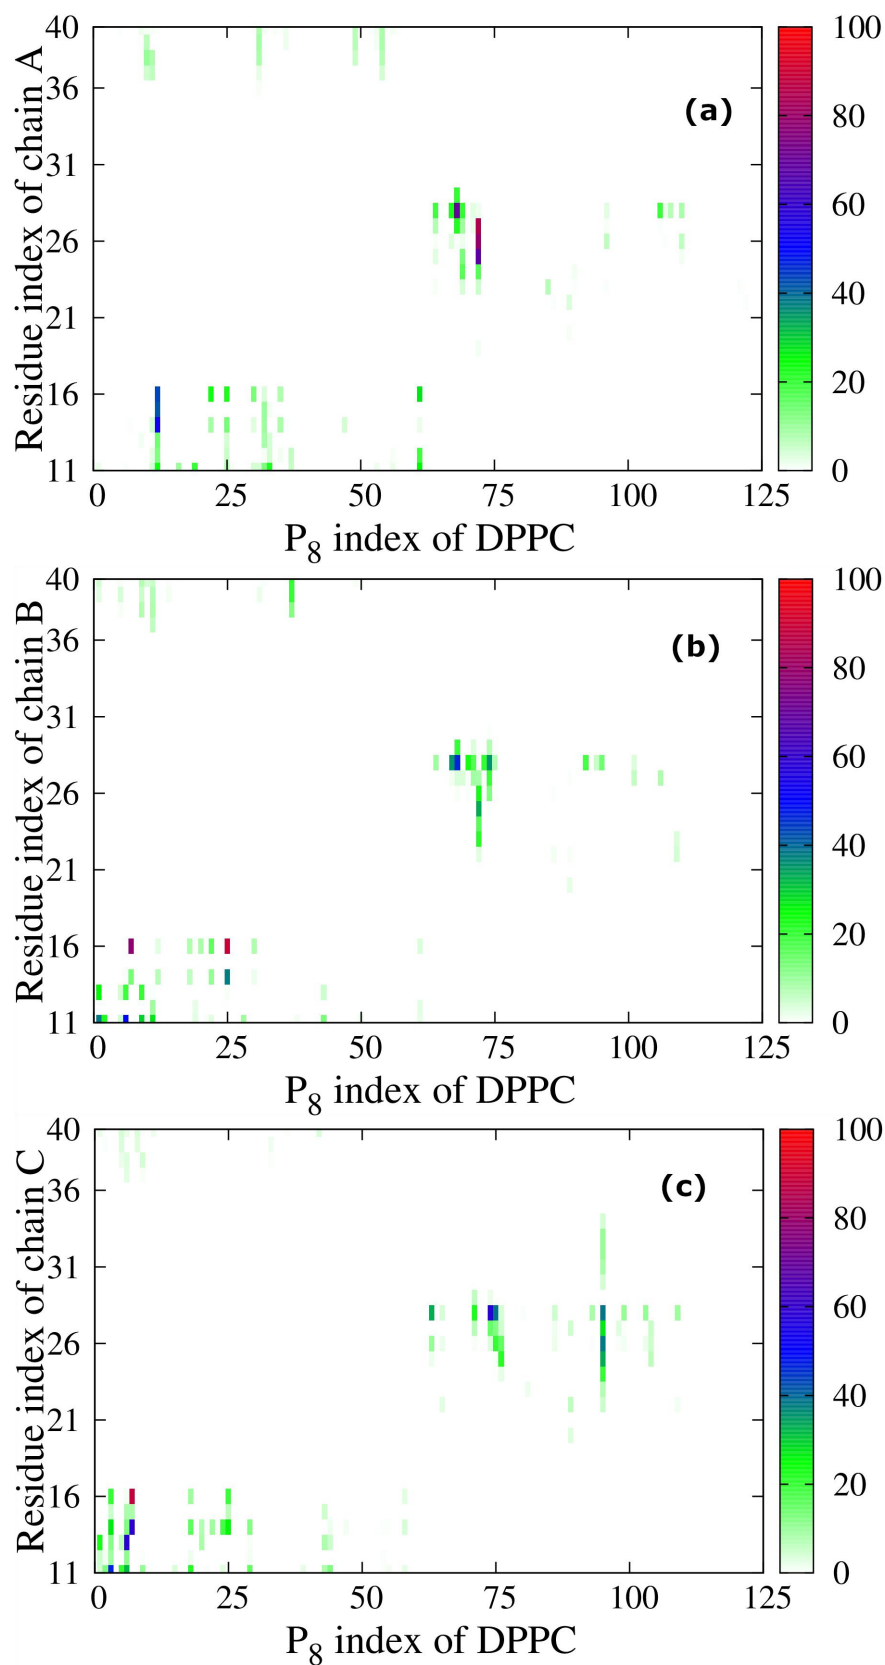

Figure S7: The contacts map between phosphate atom of lipid bilayers with each residues of each chain of the F19W 3A $\beta$ <sub>11-40</sub>

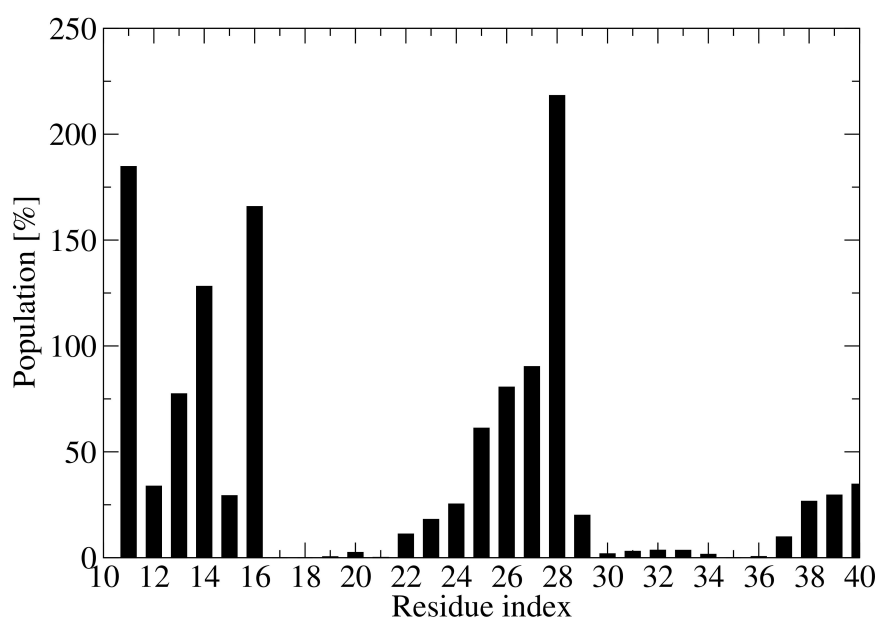

Figure S8: Averaged population of inter-molecular contacts between phosphate atoms of DPPC lipid bilayers and heavy atoms per residue of the truncated F19W 3A $\beta$ <sub>11-40</sub>

Table S2: The probabilities of SC-SC inter-peptide contacts between neighbor pair chains of the truncated mutant trimer.

| Probabilities    | Chain A - Chain B (Figure 5a)                                                                                                                                                                                                                                                                                                                             | Chain B - Chain C (Figure 5b)                                                                                                                                       |
|------------------|-----------------------------------------------------------------------------------------------------------------------------------------------------------------------------------------------------------------------------------------------------------------------------------------------------------------------------------------------------------|---------------------------------------------------------------------------------------------------------------------------------------------------------------------|
| <b>&gt;80%</b>   | W19-W19 (97.44%), Q15-Q15 (93.81%), F20-F20 (93.41%), M35-M35 (92.10%), L17-L17 (88.47%), L34-L34 (86.17%)                                                                                                                                                                                                                                                | F20-F20 (97.81%), L17-L17 (92.05%), W19-W19 (90.06%), L34-L34 (85.71%), M35-M35 (80.37%), Q15-H13 (80.31%)                                                          |
| <b>60% - 80%</b> | H14-H14 (79.92%), V18-F20 (79.65%), I31-I31 (75.65%), I32-I32 (75.16%) and V18-V18 (62.01%)                                                                                                                                                                                                                                                               | H13-H13 (77.61%), I32-I32 (73.42%), K16-K16 (72.67%), H14-H14 (66.79%), V18-V18 (66.32%), L34-W19 (64.78%), V36-L17 (61.65%), V18-F20 (60.57%) and V36-Q15 (60.42%) |
| <b>40%-60%</b>   | <p><b>N-terminal – N-terminal:</b><br/>K16-K16(52.04%),V12-H14(49.20%), H13-H13 (43.12%)</p> <p><b>CHC – CHC:</b><br/>A21-W19(56.30%),W19-L17(51.59%)</p> <p><b>C-terminal – C-terminal:</b><br/>I32-A30(50.71%), V36-V36 (49.76%)</p> <p><b>C-terminal – CHC:</b><br/>L34 – L17 (46.44%)</p> <p><b>C-terminal – N-terminal:</b><br/>V36-Q15 (56.22%)</p> | <p>V12-E11 (41.64%),</p> <p>A21-A21 (49.85%)</p> <p>L34-L17 (43.17%)</p>                                                                                            |

|                |                                                                                                                                                                                                                                                                                                                                                                                                                                                                                                    |                                                                                                                                                                                                                                                                       |
|----------------|----------------------------------------------------------------------------------------------------------------------------------------------------------------------------------------------------------------------------------------------------------------------------------------------------------------------------------------------------------------------------------------------------------------------------------------------------------------------------------------------------|-----------------------------------------------------------------------------------------------------------------------------------------------------------------------------------------------------------------------------------------------------------------------|
|                | <p><b>Loop – Loop:</b><br/>N27-N27(46.58%), E22-E22 (41.82%)</p>                                                                                                                                                                                                                                                                                                                                                                                                                                   |                                                                                                                                                                                                                                                                       |
| <b>20%-40%</b> | <p><b>N-terminal – N-terminal:</b><br/>V12-V12(32.16%),V12-H13(33.69%),<br/>H14-H13(33.68%),Q15-H13(36.50%),<br/>H13-E11(25.88%)</p> <p><b>Loop – CHC:</b> E22-A21 (33.66%)</p> <p><b>Loop – Loop:</b><br/>E22-D23(30.17%);D23-N27 (27.04%),</p> <p><b>C-terminal – C-terminal:</b><br/>A30-A30 (21.78%), L34-I32(26.90%),<br/>V36-L34 (21.12%)</p> <p><b>C-terminal – CHC:</b><br/>V36-L17 (39.94%)</p> <p><b>C-terminal – N-terminal:</b><br/>V40-H13 (25.1%)</p>                                | <p>V12-V12(37.68%), V12-H14(36.90%)</p> <p>E22-E22 (29.11%)</p> <p>A30-A30 (24.34%)</p> <p>I32–A21 (30.89%), I32-W19 (28.42%),<br/>A30-A21 (23.91%)</p> <p><b>CHC – CHC:</b><br/>W19-L17(37.90%),A21-W19(35.83%)</p> <p><b>C-terminal–loop:</b> A30 – D23: 22.91%</p> |
| <b>&lt;20%</b> | <p><b>C-terminal – C-terminal:</b><br/>I32-L34(18.05%), L34-V36(17.48%),<br/>V36-V39(16.14%), V39-<br/>M35(11.57%), V40-V39(10.71%)</p> <p><b>C-terminal – Loop:</b><br/>A30-N27 (19.71%)</p> <p><b>Loop – Loop:</b><br/>K28-K28(19.74%), N27-S26(16.31%),<br/>N27-K28 (13.55%)</p> <p><b>C-terminal – CHC:</b><br/>I32-W19 (10.74%), L34-W19<br/>(10.74%)</p> <p><b>N-terminal – N-terminal:</b><br/>V12-E11 (15.70%), H13-Q15<br/>(12.27%), K16-H14 (14.55%)</p> <p><b>N-terminal – CHC:</b></p> | <p>I32-L34(12.88%), L34-V36(15.38%),<br/>V36-L34(19.72%), V40-V39(13.69%)</p> <p>I32- V24 (16.19%)</p> <p>L34-A21 (13.41%),V36-W19 (12.08%)</p> <p>V12-H13(15.51%), H13-E11 (11.41%),</p>                                                                             |

|  |               |                  |
|--|---------------|------------------|
|  | Q15-L17 (10%) | Q15-L17 (12.37%) |
|--|---------------|------------------|

Table S3: The probabilities of BB-BB inter-peptide contacts between neighbor pair chains of the truncated mutant trimer.

| Probabilities | Chain A - Chain B (Figure 5d)                                                                                                                                                                                                                                                                                                                                                                                                                        | Chain B - Chain C (Figure 5e)                                                                                                                                                                                                                                                                                                                                                                |
|---------------|------------------------------------------------------------------------------------------------------------------------------------------------------------------------------------------------------------------------------------------------------------------------------------------------------------------------------------------------------------------------------------------------------------------------------------------------------|----------------------------------------------------------------------------------------------------------------------------------------------------------------------------------------------------------------------------------------------------------------------------------------------------------------------------------------------------------------------------------------------|
| >80%          | I32-G33 (99.83%), L17-K16 (99.44%), L34-G33 (99.25%), L34-M35 (99.24%), K16-K16 (99.16%), I32-I31 (99.14%), L17-V18 (98.91%), Q15-K16 (98.77%), L17-L17 (97.89%), L34-L34 (97.58%), V18-V18 (97.52%), G33-G33 (96.97%), Q15-Q15 (96.56%), V30-I31 (96.11%), I32-I32 (95.37%), I31-I31 (95.18%), M35 - M35 (94.74%), V36-M35 (92.63%), Q15-H14(90.23%), W19-V18 (89.90%), W19-W19 (89.11%), A30-A30 (88.40%), V36 - V36 (88.05%) and W19-F20 (83.28%) | L34-M35 (99.45%), W19-W19 (98.40%), V18-V18 (98.09%), W19-F20 (98.06%), M35-M35 (97.93%), F20-F20 (97.77%), L17-V18 (97.33%), W19-V18 (95.81%), V36-M35 (94.83%), A21-F20 (94.55%), L17-L17 (94.25%), K16-K16 (93.89%), L34-L34 (93.85%), I32-G33 (93.71%), Q15-K16 (92.25%), L17-K16 (91.33%), L34-G33 (90.27%), G33-G33 (88.53%), V36-V36 (86.09%), V36-G37 (85.37%) and A21-A21 (83.31%). |
| 60%-80%       | H14-H14 (79.27%), F20-F20 (70.44%), V36-G37 (67.66%), G29-G29 (64.52%), G37-G37 (62.44%)                                                                                                                                                                                                                                                                                                                                                             | G37-G37 (77.45%), Q15-H14 (75.99%), Q15-Q15 (72.02%), H14-H14 (64.22%), I32-I32 (63.75%), I32-I31 (63.64%), H13-H14 (60.30%)                                                                                                                                                                                                                                                                 |
| 40%-60%       | A21-F20 (55.24%), G29-K28 (40.48%), and H13-H14 (42.36%)                                                                                                                                                                                                                                                                                                                                                                                             | I31-I31 (59.93%) and A30-I31 (55.89%)                                                                                                                                                                                                                                                                                                                                                        |
| 20%-40%       | V38-V38 (39.94%), V38-V37 (39.64%), V30-G29 (39.84%), N27-N27 (23.86%), N27-S26 (20.77%), A21-A21 (22.75%), H13-H13 (31.59%), H13-V12 (26.38%) and V12 -V12 (25.82%)                                                                                                                                                                                                                                                                                 | residues 36 – 39 of chain B with residues 37 – 39 of chain C (mean probability of 27.59%)<br>A30-A30 (35.17%), A30 with residues D23, V24 (38.33%), G29-A30 (20.55%), G29-D23 (23.18%), G29-V24 (31.91%), A21-E22 (35.84%), E22-E22 (22.30%) and H13 with residue E11, V12, H13 (probability of 27.65%)                                                                                      |
| <20%          | K28-K28 (14.46%), N27-K28 (7.37%) and S26-S26 (7.29%)                                                                                                                                                                                                                                                                                                                                                                                                | A30-G25 (15%), G29-G25 (14.26%), G29-G29 (17%), G29-K28 (17%), K28-S26 (8.93%), D23-E22 (7.6%), D23-V24 (7.6%), N27-G25(7%).                                                                                                                                                                                                                                                                 |

Table S4: Characterizations of the structures of the first 4 main States S1-S4 of the transmembrane F19W 3A $\beta_{11-40}$ : Shown are the  $\beta$ -strands and coils positions, the orientation of 2  $\beta$ -sheets and the inter-peptide contacts that stabilize the 2  $\beta$ -domains

| State     | $\beta$ -strands positions                                                 | Coils positions                                                                              | Orientation of 2 $\beta$ -sheets | Inter-peptide contacts                                                    |
|-----------|----------------------------------------------------------------------------|----------------------------------------------------------------------------------------------|----------------------------------|---------------------------------------------------------------------------|
| <b>S1</b> | 15-20, 28-36 : chain A<br>15-19, 28-36 : chain B<br>15-19, 28-35 : chain C | 11-14, 21-27, 37-40: chain A<br>11-14, 20-27, 37-40: chain B<br>11-14, 20-27, 36-40: chain C | antiparallel                     | CHC-CHC, Cter-Cter and CHC-Cter, Nter-Nter between 2 adjacent pair chains |
| <b>S2</b> | 14-23, 30-36 : chain A<br>14-21, 29-36 : chain B<br>15-20, 31-36 : chain C | 11-13, 24-29, 37-40: chain A<br>11-13, 22-28, 37-40: chain B<br>11-14, 21-30, 37-40: chain C | perpendicular                    | Nter-Nter, CHC-CHC and Cter-Cter between 2 adjacent pair chains           |
| <b>S3</b> | 14-21, 31-35 : chain A<br>14-21, 30-36 : chain B<br>15-19, 30-36 : chain C | 11-13, 22-30, 36-40: chain A<br>11-13, 22-29, 37-40: chain B<br>11-14, 20-29, 37-40: chain C | antiparallel                     | Nter-Nter, CHC-CHC and Cter-Cter                                          |
| <b>S4</b> | 16-22, 30-33 : chain A<br>15-22, 30-37 : chain B<br>15-17, 31-36 : chain C | 11-15, 23-29, 34-40: chain A<br>11-14, 23-29, 38-40: chain B<br>11-14, 18-30, 37-40: chain C | antiparallel                     | CHC-CHC and Cter-Cter                                                     |
